# Supplementary material for: Ultra-low resistance at TTF–TCNQ organic interfaces
Source: Royal Society of Chemistry journal article supplement (doi:10.1039/c0cc00955e), 2010-01-01
Supplement: c0cc00955e.pdf [file c0cc00955e.pdf]

## Supportive Information

### Ultra low resistance at TTF-TCNQ organic interfaces

Shuhao Wen, Wei-Qiao Deng\* and Ke-Li Han\*

Figure S1 The geometry parameters of TTF and TCNQ. CT refers to the molecules in the charge-transfer complex. NE stays for the molecules without charge-transfer.

Bond lengths are in Å, and bond angles (in italics) are in degree.

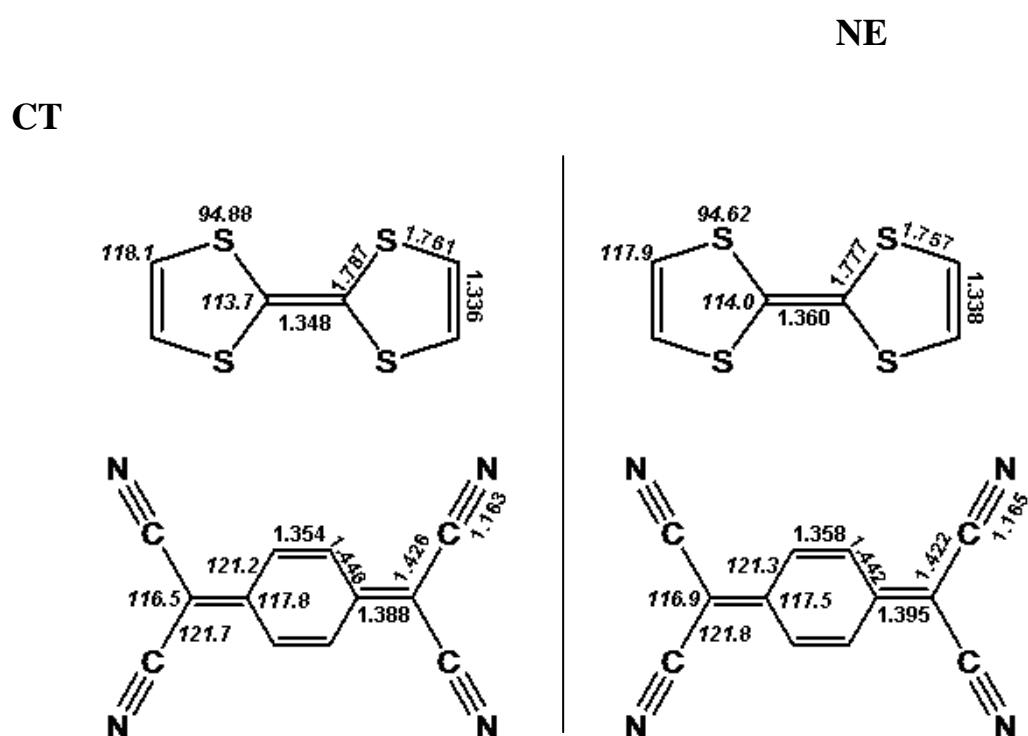

## 2, Computational methods of electronic coupling

$$V = \frac{J_{RP} - S_{RP}(H_{RR} + H_{PP})/2}{1 - S_{RP}^2}$$

Assuming  $h_{ks}$  is the system Kohn-Sham Hamiltonian which consists of two monomers, then,

for *P*-type TTF,

$$J_{RP} = \langle \phi_{HOMO}^{TTF_{C1}} | h_{ks} | \phi_{HOMO}^{TTF_{C2}} \rangle$$

$$S_{RP} = \langle \phi_{HOMO}^{TTF_{C1}} | \phi_{HOMO}^{TTF_{C2}} \rangle$$

$$H_{RR} = \langle \phi_{HOMO}^{TTF_{C1}} | h_{ks} | \phi_{HOMO}^{TTF_{C1}} \rangle$$

$$H_{PP} = \langle \phi_{HOMO}^{TTF_{C2}} | h_{ks} | \phi_{HOMO}^{TTF_{C2}} \rangle$$

for *n*-type TCNQ,

$$J_{RP} = \langle \phi_{LUMO}^{TCNQ_{C1}} | h_{ks} | \phi_{LUMO}^{TCNQ_{C2}} \rangle$$

$$S_{RP} = \langle \phi_{LUMO}^{TCNQ_{C1}} | \phi_{LUMO}^{TCNQ_{C2}} \rangle$$

$$H_{RR} = \langle \phi_{LUMO}^{TCNQ_{C1}} | h_{ks} | \phi_{LUMO}^{TCNQ_{C1}} \rangle$$

$$H_{PP} = \langle \phi_{LUMO}^{TCNQ_{C2}} | h_{ks} | \phi_{LUMO}^{TCNQ_{C2}} \rangle$$

The HOMO or LUMO of TTF and TCNQ used in these equations are orthogonalized by performing Löwdin's symmetric transformation.

Table S1. Calculation details of electronic coupling elements including spatial overlap ( $S_{RP}$ ), charge transfer integral ( $J_{RP}$ ), and site energies ( $H_{RR}$ ,  $H_{PP}$ ). The  $V$  of Pentacene (PENT) and Rubrene (RUBR) are calculated as reference and compared with the previous work<sup>a,b</sup>.

| dimer   | $J_{RP}$ (Hartree) | $S_{RP}$ (Hartree) | $H_{RR}$ (Hartree) | $H_{PP}$ (Hartree) | $ V $ (eV)           |
|---------|--------------------|--------------------|--------------------|--------------------|----------------------|
| PENT_T1 | 0.006148971        | -0.01895235        | -0.14930137        | -0.17013888        | 0.084982407          |
|         |                    |                    |                    |                    | 0.085 <sup>a</sup>   |
|         |                    |                    |                    |                    | 0.0934 <sup>b</sup>  |
| PENT_T2 | -0.00333378        | 0.009910871        | -0.16989312        | -0.1504131         | 0.047530247          |
|         |                    |                    |                    |                    | 0.051 <sup>a</sup>   |
|         |                    |                    |                    |                    | 0.0621 <sup>b</sup>  |
| PENT_P  | 0.002209107        | -0.00616696        | -0.16465155        | -0.16465841        | 0.032483333          |
|         |                    |                    |                    |                    | 0.037 <sup>a</sup>   |
|         |                    |                    |                    |                    | 0.0357 <sup>b</sup>  |
| PENT_L  | 0.00012707         | -0.00046319        | -0.16511826        | -0.16512224        | 0.00013766           |
|         |                    |                    |                    |                    | 0 <sup>a</sup>       |
|         |                    |                    |                    |                    | 0.00015 <sup>b</sup> |
| RUBR_T1 | -0.00129258        | 0.004178909        | -0.15926568        | -0.15969048        | 0.01903513           |
|         |                    |                    |                    |                    | 0.015 <sup>a</sup>   |
| RUBR_T2 | -0.00129241        | 0.004178930        | -0.15926713        | -0.15968359        | 0.01903417           |
|         |                    |                    |                    |                    | 0.015 <sup>a</sup>   |
| RUBR_P  | 0.006339604        | -0.019348006       | -0.15945768        | -0.15945258        | 0.088592390          |
|         |                    |                    |                    |                    | 0.083 <sup>a</sup>   |
| RUBR_L  | 0.000010137        | 0.0000323046       | -0.16132613        | -0.16132511        | -0.00013404          |
|         |                    |                    |                    |                    | 0 <sup>a</sup>       |
| TTF_T1  | -1.546E-05         | -1.8247E-05        | -0.14835916        | -0.1483481         | 0.000494342          |
| TTF_T2  | 0.001054494        | -0.00227273        | -0.14761619        | -0.14760314        | 0.019565736          |
| TTF_T3  | 0.000376946        | -0.00141602        | -0.14470652        | -0.14469519        | 0.004681662          |
| TTF_P   | 0.008391899        | -0.0294397         | -0.14002637        | -0.14002572        | 0.116282722          |
| TTF_L1  | 0.00029928         | 0.0009518          | -0.14602174        | -0.15123185        | 0.004294469          |
| TTF_L2  | 0.000996628        | -0.00261408        | -0.15025877        | -0.14280825        | 0.016696562          |
| TTF_L3  | -2.0445E-06        | 7.56455E-06        | -0.14587479        | -0.14592421        | 2.56018E-05          |
| TCNQ_T1 | 9.29E-04           | -0.00251941        | -0.20407437        | -0.20407465        | 0.011299177          |
| TCNQ_T2 | 0.000876645        | -0.00196296        | -0.20751495        | -0.20750624        | 0.012770737          |
| TCNQ_T3 | -8.171E-05         | 0.000285484        | -0.20642388        | -0.20642285        | 0.000619858          |
| TCNQ_P  | 0.003517281        | -0.00850511        | -0.2076222         | -0.20761299        | 0.047663783          |
| TCNQ_L1 | -1.0059E-05        | 3.17466E-05        | -0.20551763        | -0.20462494        | 9.65743E-05          |

|         |             |             |             |             |             |
|---------|-------------|-------------|-------------|-------------|-------------|
| TCNQ_L2 | 0.000628717 | -0.00168697 | -0.20552611 | -0.205532   | 0.007673586 |
| TCNQ_L3 | -0.00011615 | 0.000366895 | -2.01E-01   | -0.20149282 | 0.001148979 |

<sup>a</sup> Coropceanu, V.; Cornil J.; da Silva Filho, D. A.; Olivier Y.; Silbey R.; Brédas, J.-L. *Chem. Rev.* **2007**, *107*, 926-952.

<sup>b</sup> Li, L. Q.; Tang, Q. X.; Li, H. X.; Yang, X. D.; Hu, W. P.; Song, Y. B.; Shuai, Z. G.; Xu, W.; Liu, Y. Q.; Zhu, D. B. *Adv. Mater.* **2007**, *19*, 2613-2617.

Figure S2, The TTF-TCNQ interface configurations with the TTF crystal *a-b*, *a-c* or *b-c* plane on the TCNQ crystal *a-b*, *a-c* or *b-c* plane (intermolecular distances at the interface  $> 3.5$  Å considering the interface fabrication by the lamination technique<sup>4</sup>).

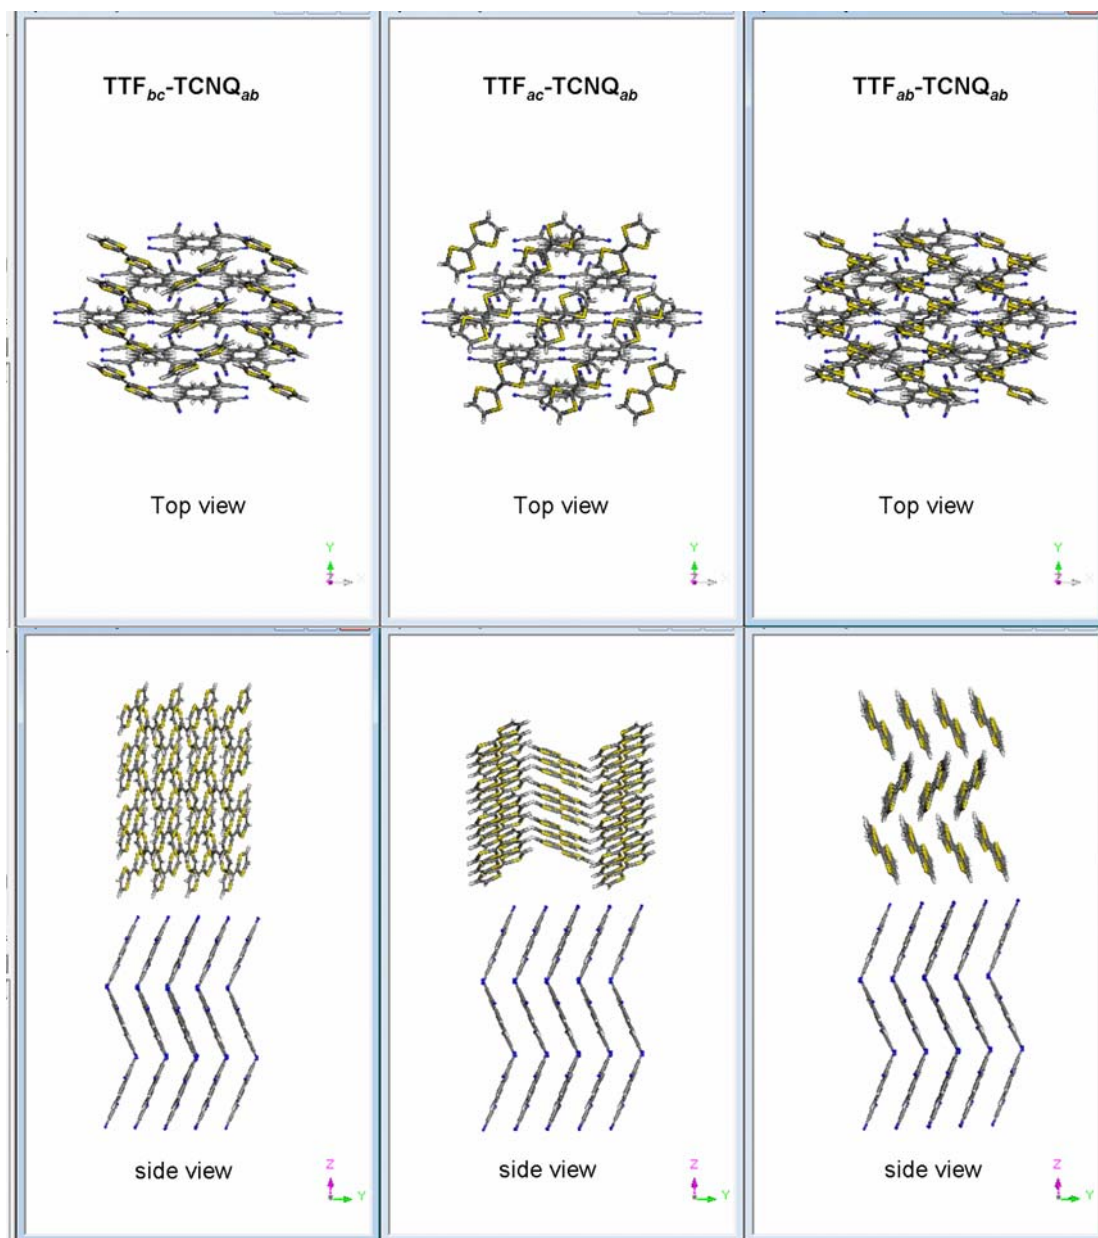

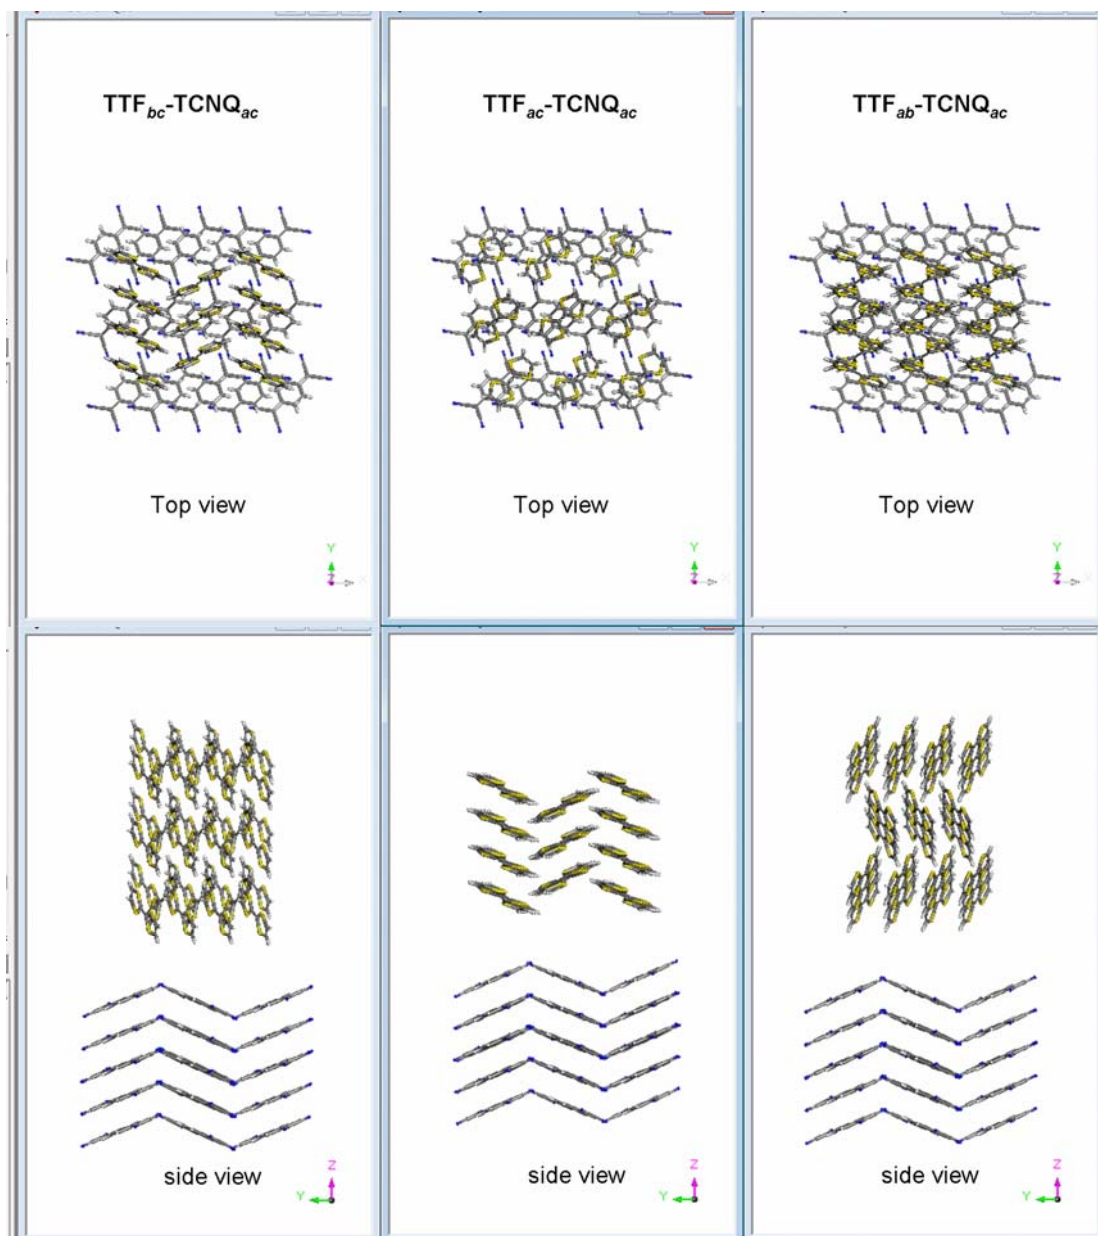

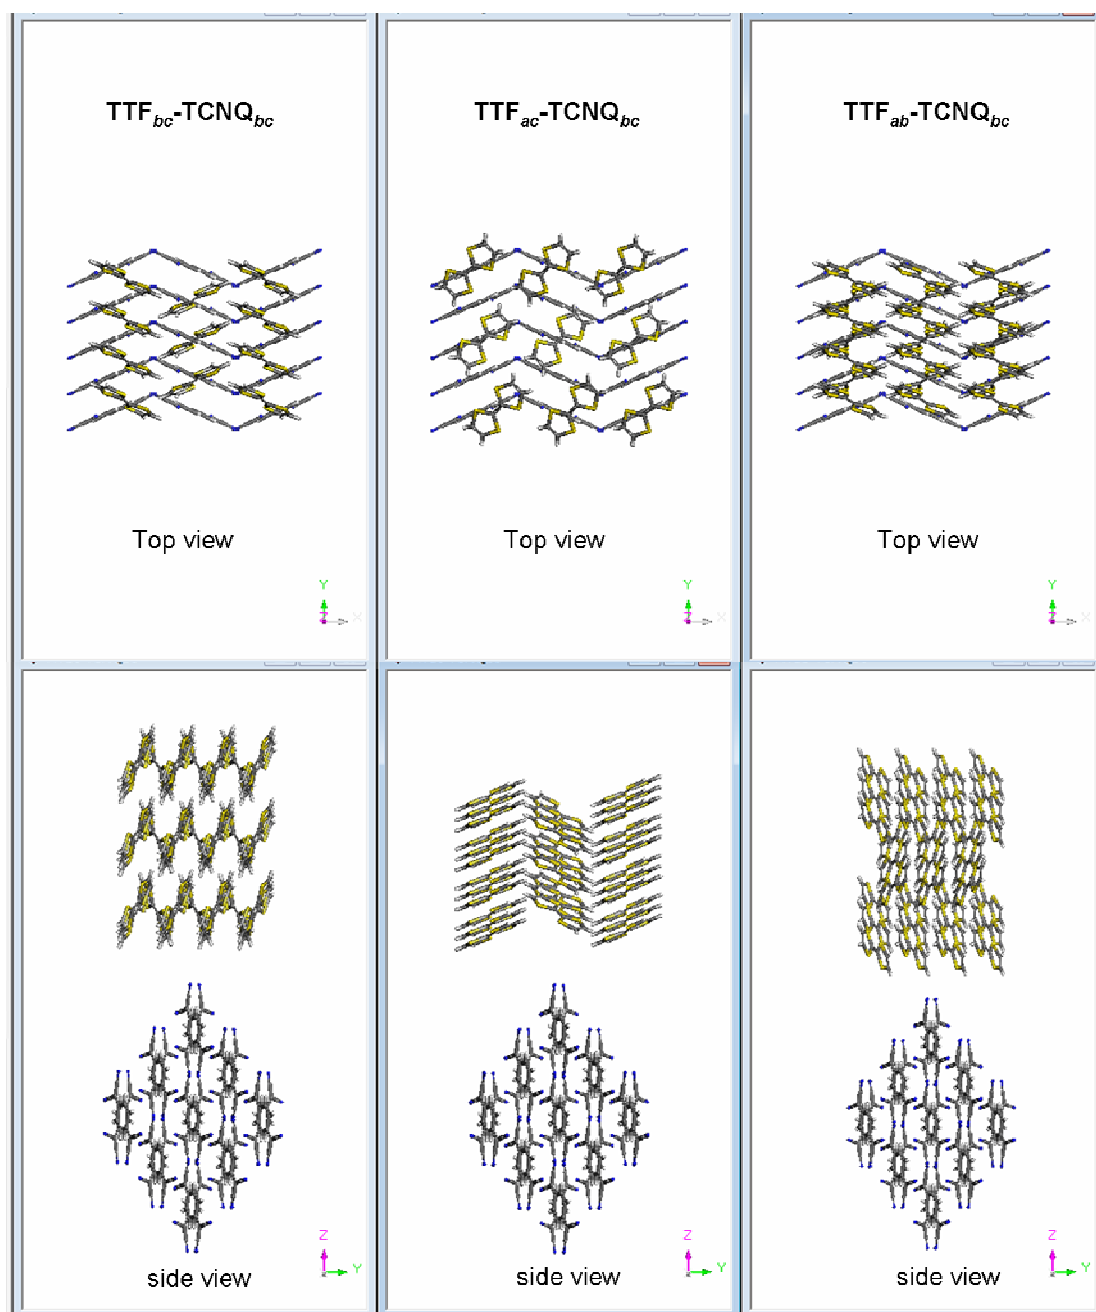

H. Alves, A. S. Molinari, H. X. Xie, A. F. Morpurgo, *Nature Materials* **2008**, 7, 574.

Table S3, Calculation details of reorganization energy, adiabatic ionization potential (IP) and electron affinities (EA) where  $E_0$  and  $E_{+/-}$  represent the energies of the neutral and cation/anion species in their lowest energy geometries, respectively;  $E_0^*$  and  $E_{+/-}^*$  are the energies of the neutral and cation/anion states with the geometries of the cation/anion and neutral species, respectively.

$$\lambda = \lambda_0 + \lambda_{+/-} = (E_0^* - E_0) + (E_{+/-}^* - E_{+/-})$$

$$IP / EA = E_{+/-}^* - E_0$$

|      | $\lambda$ (eV) | $IP/EA$ (eV)                   | HOMO (eV) | LUMO (eV) | $\Delta E$ (eV) |
|------|----------------|--------------------------------|-----------|-----------|-----------------|
| TCNQ | 0.2640         | 3.44<br>(3.3±0.3) <sup>a</sup> | -7.57     | -5.01     | 2.56            |
| TTF  | 0.2896         | 6.95<br>(6.83) <sup>b</sup>    | -4.68     | -1.03     | 3.65            |

|      |                 |                   |                 |                   |          |                |
|------|-----------------|-------------------|-----------------|-------------------|----------|----------------|
|      | $E_0$ (Hartree) | $E_0^*$ (Hartree) | $E_+$ (Hartree) | $E_+^*$ (Hartree) | IP (eV)  | $\lambda$ (eV) |
| TTF  | -1823.89257     | -1823.88716       | -1823.66156     | -1823.65633       | 6.4283   | 0.2896         |
| PENT | -846.98821      | -846.98649        | -846.76312      | -846.76125        | 6.1758   | 0.0976         |
| RUBR | -1617.69581     | -1617.69301       | -1617.47425     | -1617.47148       | 6.1032   | 0.1521         |
|      | $E_0$ (Hartree) | $E_0^*$ (Hartree) | $E_-$ (Hartree) | $E_-^*$ (Hartree) | EA (eV)  | $\lambda$ (eV) |
| TCNQ | -678.74325      | -678.73853        | -678.87479      | -678.86981        | 3.443749 | 0.264          |

<sup>a</sup> C. Jin, R. E. Haufler, R. L. Hettich, C. M. Barshick, R. N. Compton, A. A. Puzos, A. V. Demchenko, A. A. Tuinman, *Science* **1995**, 267, 440.

<sup>b</sup> E. M. Engler, F. B. Kaufman, D. C. Green, C. E. Klots, R. N. Compton, *J. Am. Chem. Soc.* **1975**, 97, 2921.



Table S4. Crystal structural data of TTF, TCNQ

|                             | TTF        | TCNQ       |
|-----------------------------|------------|------------|
| System                      | Monoclinic | Monoclinic |
| Space group                 | P21/C      | C2/C       |
| <i>a</i> /Å                 | 7.352      | 8.906      |
| <i>b</i> /Å                 | 4.0181     | 7.06       |
| <i>c</i> /Å                 | 13.901     | 16.395     |
| <i>α</i> /deg               | 90         | 90         |
| <i>β</i> /deg               | 101.426    | 98.53      |
| <i>γ</i> /deg               | 90         | 90         |
| <i>D</i> /gcm <sup>-3</sup> | 1.686      | 1.330      |
| Volume/Å <sup>3</sup>       | 402.512    | 1019.455   |
| Reference                   | 1          | 2          |

1. Cooper, W. F.; Kenny, N. C.; Edmonds, J. W.; Nagel, A.; Wudl, F.; Coppens, P. *J. Chem. Soc. D* **1971**, 16 889-890
2. Long, R. E.; Sparks, R. A.; Trueblood, K. N. *Acta Crystallogr.* **1965**, 18, 932-939.

Table S5. The evaluation of the electron and hole density (*C*, in e·cm<sup>-2</sup>) at the interface. *N* is the molecule amount per plane of TTF and TCNQ primitive cell; *S* is the area of the crystal plane (in Å<sup>2</sup>); *Q* (in e) is the calculated charge transfer per molecule.

| Unit <i>a-b</i> plane                                                               | <i>N</i> | <i>S</i> | <i>Q</i>      | <i>C</i>                     |
|-------------------------------------------------------------------------------------|----------|----------|---------------|------------------------------|
| 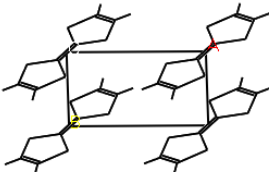 | 1        | 29.54    |               | (0.84-1.39)×10 <sup>14</sup> |
|  | 1        | 31.44    | 0.2498-0.4109 | (0.79-1.31)×10 <sup>14</sup> |

Figure S3, Illustration of Dimer types in TTF (a) and TCNQ (b) crystal

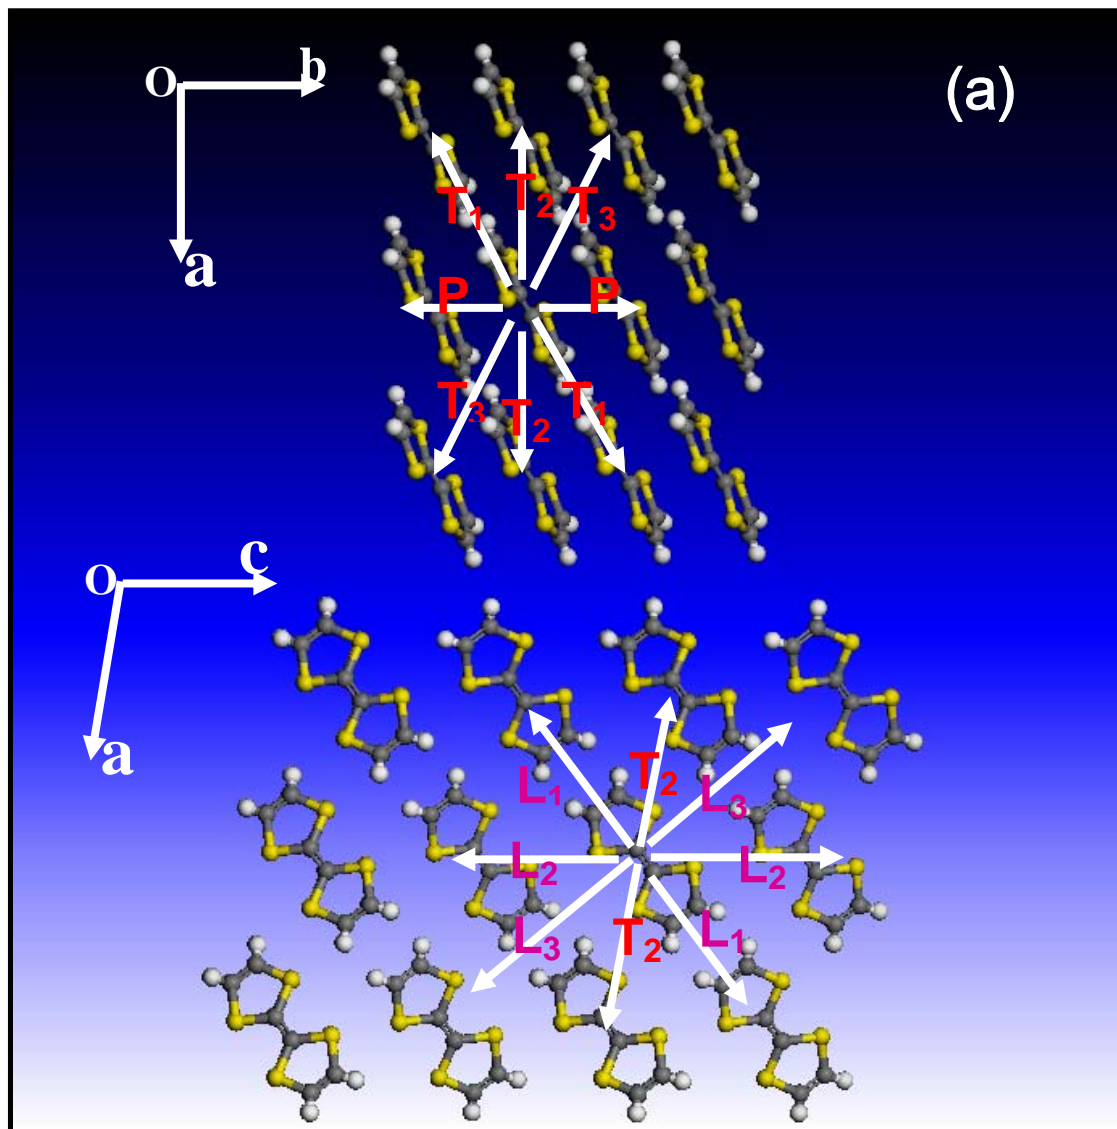

Crystal cell of TTF crystal

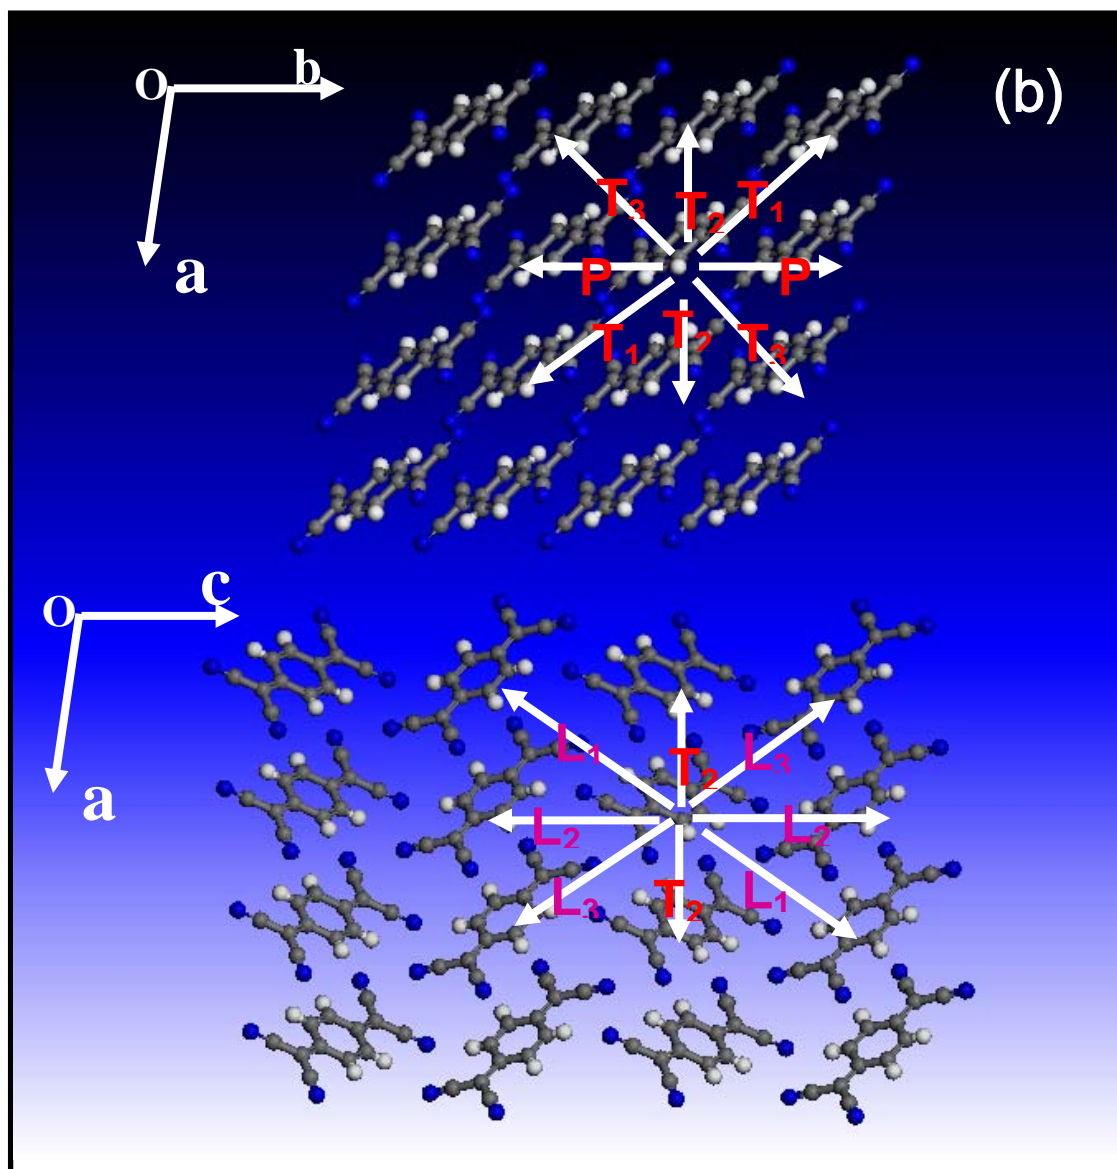

Primitive cell of TCNQ crystal

Figure S4, Illustration of projecting different hopping paths to a transistor channel in the  $a$ - $b$  plane of TTF single crystals; ( $\theta_0$ ,  $\theta_1$ ,  $\theta_2$  and  $\theta_3$  are the angles of P, T1, T2, and T3 dimers relative to the reference crystallographic axis  $b$ ;  $\phi$  is the angle of a conduction channel relative to the reference axis  $b$ ).

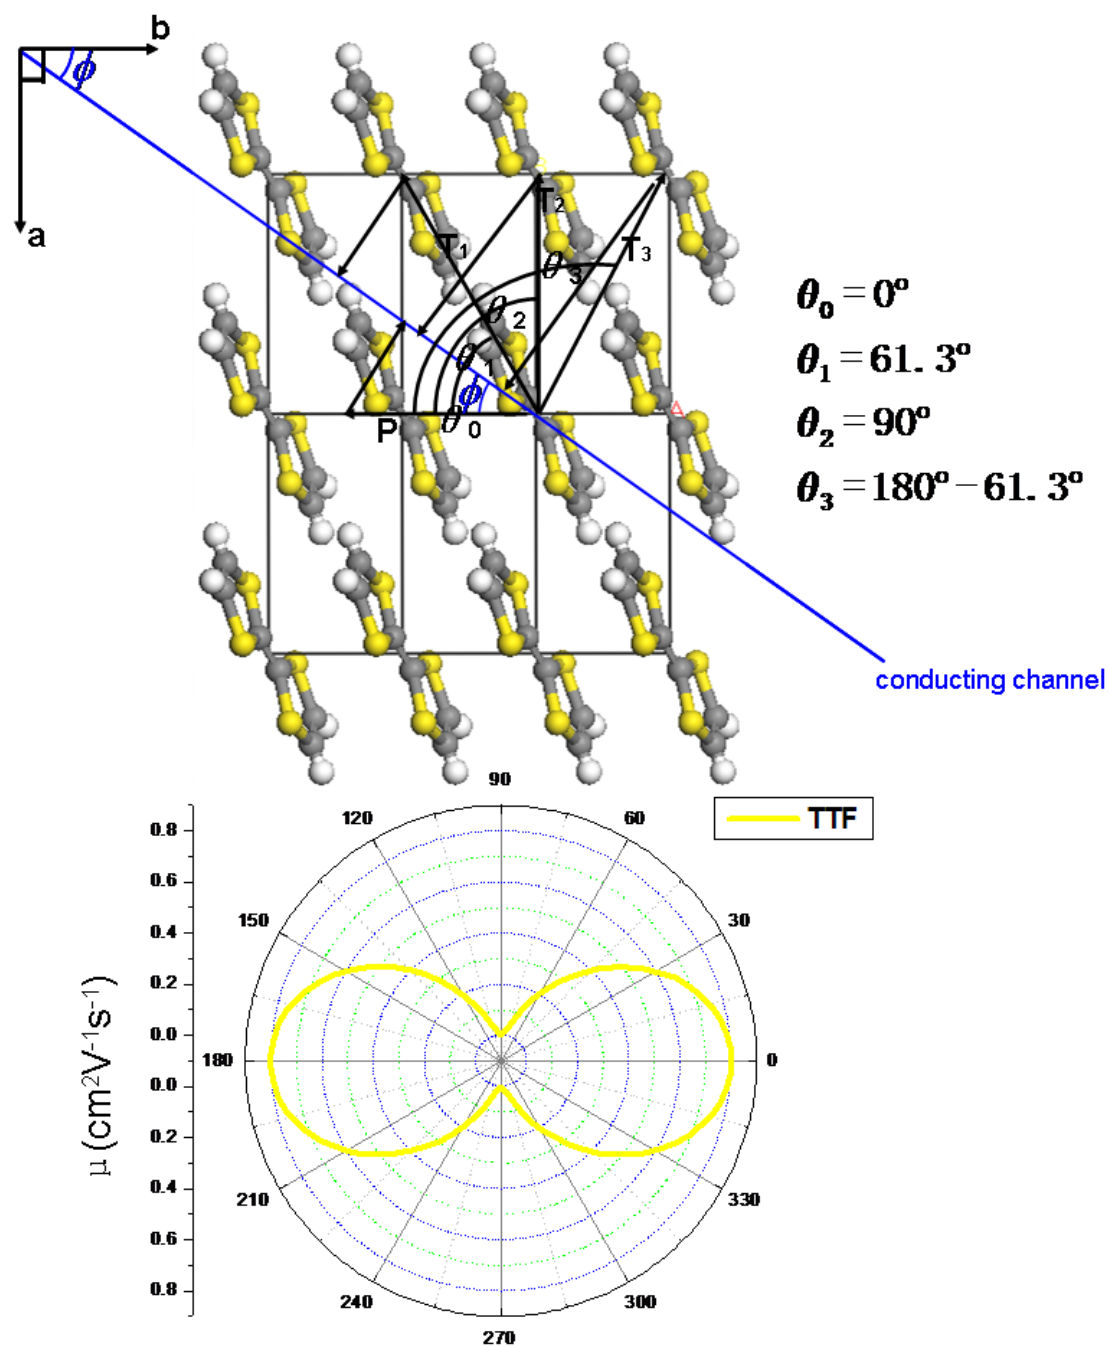

Figure S5 Illustration of projecting different hopping paths to a transistor channel in the  $a$ - $b$  plane of TCNQ crystal primitive cell; ( $\theta_0$ ,  $\theta_1$ ,  $\theta_2$  and  $\theta_3$  are the angles of P, T1, T2, and T3 dimers relative to the reference crystallographic axis  $b$ ;  $\Phi$  is the angle of a conduction channel relative to the reference axis  $b$ ).

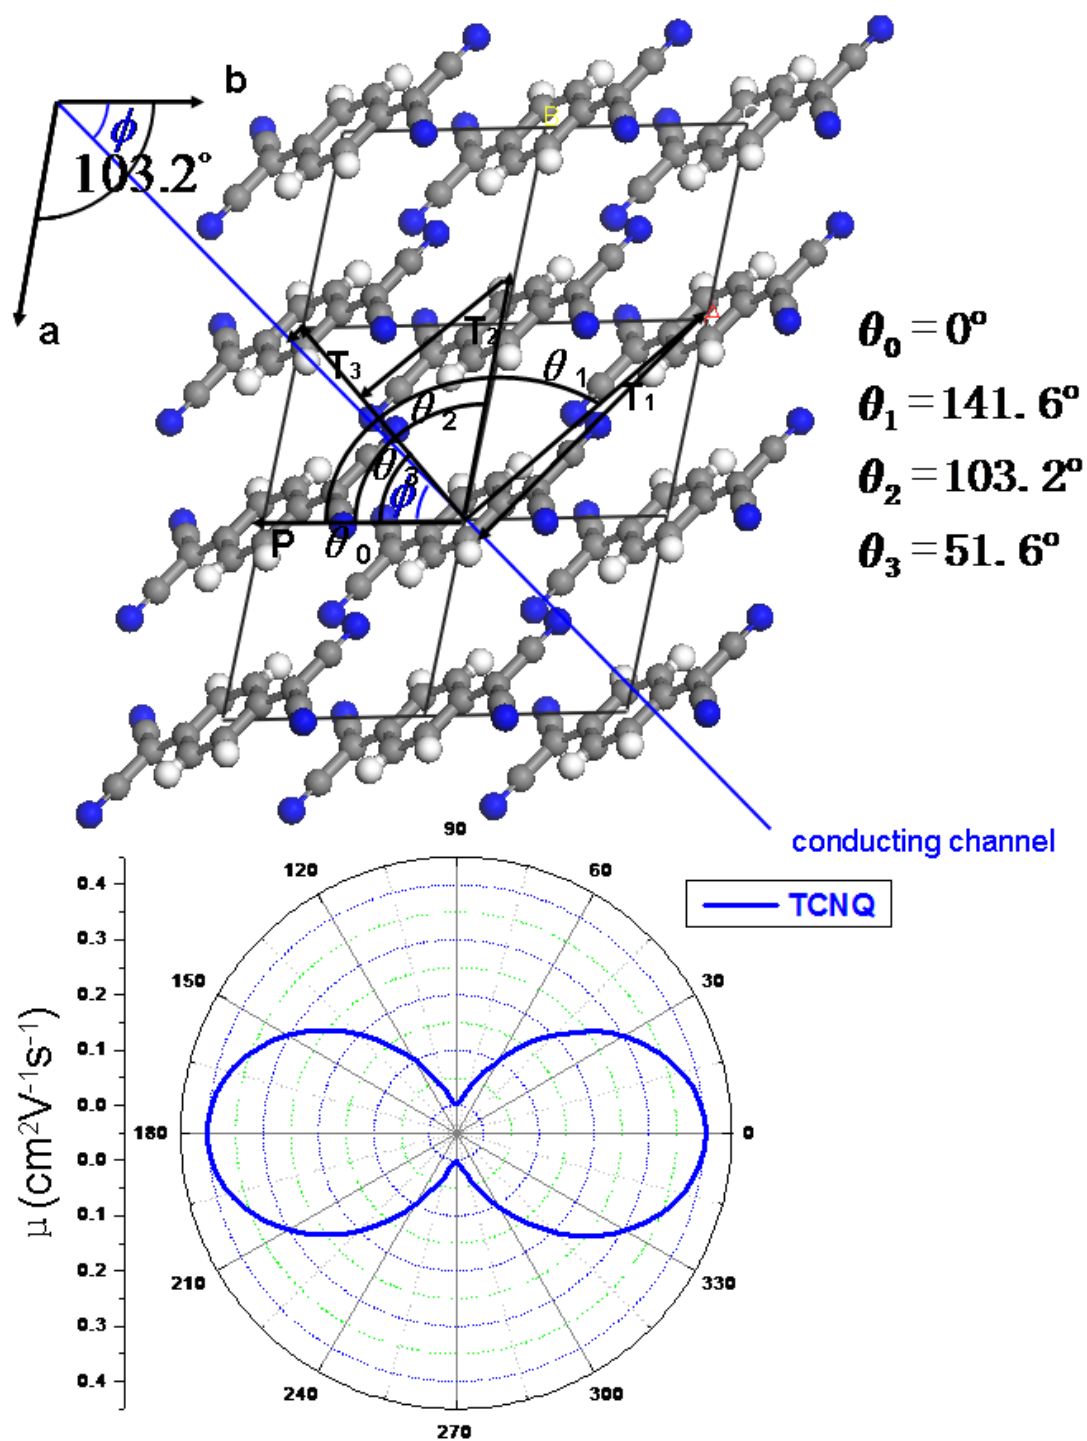

$$\mu_\phi = 0.36 \cos^2 \phi + 0.21 \times 10^{-2} \cos^2(141.6^\circ - \phi) + 1.63 \times 10^{-3} \cos^2(103.2^\circ - \phi) + 1.32 \times 10^{-8} \cos^2(51.6^\circ - \phi)$$
